# Supplementary material
Source: publisher figshare collection journal article supplement (https://acs.figshare.com/ndownloader/files/14460041)
Supplement: Supplementary file 1 [file 14460041]

## Supporting Information

# Understanding the mobilisation of a nitrification inhibitor from novel slow release pellets, fabricated through extrusion processing with PHBV biopolymer

**Authors:** Ian Levett<sup>†</sup>, Steven Pratt<sup>‡</sup>, Bogdan C. Donose<sup>†</sup>, Richard Brackin<sup>‡</sup>, Chris Pratt<sup>#</sup>, Matt Redding<sup>\*</sup>, Bronwyn Laycock<sup>†, ^</sup>

<sup>†</sup> *School of Chemical Engineering, University of Queensland, St Lucia, QLD 4072 Australia*

<sup>‡</sup> *School of Agriculture and Food Sciences, University of Queensland, St Lucia, QLD 4072, Australia*

<sup>#</sup> *School of Environment and Science, Griffith University, Nathan, QLD 4111, Australia*

<sup>\*</sup> *Department of Agriculture and Fisheries (DAF), AgriScience Queensland, Wilsonton Heights, QLD 4350, Australia*

<sup>^</sup> Corresponding author

E-mail address: [b.laycock@uq.edu.au](mailto:b.laycock@uq.edu.au)

Table S1: Summary of the soil report provided by SWEP Analytical Laboratories, Keysborough, VIC, Australia for a soil supplied from a sugarcane field in Wangan, QLD, Australia

| Cation Balance                        |        |  |           |  |  |
|---------------------------------------|--------|--|-----------|--|--|
| ITEM                                  | RESULT |  | DESIRABLE |  |  |
| pH(1:5 Water)                         | 5.5    |  | 6.5-8.0   |  |  |
| pH(1:5 0.01M CaCl <sub>2</sub> )      | 4.91   |  |           |  |  |
| Electrical Conductivity EC $\mu$ S/cm | 298    |  | < 780     |  |  |
| TOTAL SOLUBLE SALT TSS ppm            | 983.4  |  | < 2574    |  |  |
| TOTAL ORGANIC MATTER %                | 4.44   |  | 4 - 6     |  |  |
| TOTAL ORGANIC CARBON %                | 2.22   |  | 2 - 3     |  |  |

  

| EXCHANGEABLE CATIONS       |          |                 | RESULTS | DESIRABLE LEVEL |
|----------------------------|----------|-----------------|---------|-----------------|
| CALCIUM                    | Ca       | meq/100 of soil | 3.08    | 8.05            |
| MAGNESIUM                  | Mg       | meq/100 of soil | 1.05    | 1.86            |
| SODIUM                     | Na       | meq/100 of soil | 0.05    | < 0.62          |
| POTASSIUM                  | K        | meq/100 of soil | 0.32    | 0.62            |
| HYDROGEN                   | H        | meq/100 of soil | 10.1    |                 |
| ADJ. EXCH. HYDROGEN        | H        | meq/100 of soil | 7.88    | < 1.86          |
| CATION EXCHANGE CAPACITY   | CEC      | meq/100 of soil | 14.6    |                 |
| ADJUSTED CEC               | Adj. CEC | meq/100 of soil | 12.38   |                 |
| SATURATION BASE PERCENTAGE | BSP      |                 | 36      |                 |

  

| EXCHANGEABLE CATION BALANCE |       | % OF ADJUSTED CEC | DESIRABLE |
|-----------------------------|-------|-------------------|-----------|
| CALCIUM PERCENTAGE          |       | 24.9              | 65-70%    |
| MAGNESIUM PERCENTAGE        |       | 8.5               | 12-15%    |
| SODIUM PERCENTAGE           | ESP   | 0.4               | 0.5-5%    |
| POTASSIUM PERCENTAGE        |       | 2.6               | 3-5%      |
| ADJ. HYDROGEN PERCENTAGE    |       | 63.7              | <20%      |
| CALCIUM / MAGNESIUM RATIO   | Ca/Mg | 2.95              | 2 - 4     |

  

| Nutrient Balance            |         |  |                 |  |  |
|-----------------------------|---------|--|-----------------|--|--|
| ITEMS                       | RESULTS |  | DESIRABLE LEVEL |  |  |
| AVAILABLE CALCIUM Ca ppm    | 778     |  | 1843            |  |  |
| AVAILABLE MAGNESIUM Mg ppm  | 158.4   |  | 244             |  |  |
| AVAILABLE SODIUM Na ppm     | 14.076  |  | < 156           |  |  |
| AVAILABLE NITROGEN N ppm    | 80.9    |  | 102             |  |  |
| AVAILABLE PHOSPHORUS P ppm  | 15.8    |  | 75              |  |  |
| AVAILABLE POTASSIUM K ppm   | 157.17  |  | 263             |  |  |
| AVAILABLE SULPHUR S ppm     | 123     |  | 11 - 15         |  |  |
| AVAILABLE COPPER Cu ppm     | 14.9    |  | 3               |  |  |
| AVAILABLE ZINC Zn ppm       | 27.6    |  | 4 - 6           |  |  |
| AVAILABLE IRON Fe ppm       | 10      |  | > 30            |  |  |
| AVAILABLE MANGANESE Mn ppm  | 6       |  | > 20            |  |  |
| AVAILABLE COBALT Co ppm     | 2.11    |  | 0.7-0.8         |  |  |
| AVAILABLE MOLYBDENUM Mo ppm | 0.13    |  | 0.3-0.4         |  |  |
| AVAILABLE BORON B ppm       | 0.29    |  | 0.6-1.0         |  |  |
| TOTAL PHOSPHORUS TP ppm     | 1080    |  |                 |  |  |
| TOTAL NITROGEN TN %         | 0.18    |  |                 |  |  |

  

| Biology Balance                |            |          |           |             |       |
|--------------------------------|------------|----------|-----------|-------------|-------|
| ITEM                           | Result     | % of TAP | Desirable | % Desirable |       |
| ACTIVE LACTIC ACID BACTERIA    | cfu/g soil | 120,000  | 38.7%     | 113,066     | 17.0% |
| Active Fungi                   | cfu/g soil | 50,000   |           |             |       |
| Cellulose utilisers            | cfu/g soil | 70,000   |           |             |       |
| TOTAL ACTIVE FUNGI             | cfu/g soil | 120,000  | 38.7%     | 219,480     | 33.0% |
| ACTIVE YEASTS                  | cfu/g soil | 100      | 0.0%      | 106,415     | 16.0% |
| ACTIVE ACTINOMYCETES           | cfu/g soil | 70,000   | 22.6%     | 139,669     | 21.0% |
| ACTIVE PHOTOSYNTHETIC BACTERIA | cfu/g soil | 100      | 0.0%      | 86,462      | 13.0% |
| Total Active Population (TAP): | cfu/g soil | 310,200  |           | 665,092     |       |
| CARBON/NITROGEN RATIO          |            | 12.3     |           | 10-15       |       |

Table S2: Nutrient media used for leaching columns containing biologically active soil. The bulk nutrient media was diluted 1:100 with deionised water and pre-warmed to 30 °C before it was added to the column.

| NMS (for methanotrophs)                                                                                                                                                                                                                                    |      |    |
|------------------------------------------------------------------------------------------------------------------------------------------------------------------------------------------------------------------------------------------------------------|------|----|
| <b>Composition per liter</b>                                                                                                                                                                                                                               |      |    |
| Agar                                                                                                                                                                                                                                                       | 12.5 | g  |
| MgSO <sub>4</sub> ·7H <sub>2</sub> O                                                                                                                                                                                                                       | 1.0  | g  |
| KNO <sub>3</sub>                                                                                                                                                                                                                                           | 1.0  | g  |
| Na <sub>2</sub> HPO <sub>4</sub> ·H <sub>2</sub> O                                                                                                                                                                                                         | 0.7  | g  |
| KH <sub>2</sub> PO <sub>4</sub>                                                                                                                                                                                                                            | 0.3  | g  |
| CaCl <sub>2</sub> ·6H <sub>2</sub> O                                                                                                                                                                                                                       | 0.2  | g  |
| Ferric ammonium EDTA                                                                                                                                                                                                                                       | 4.0  | g  |
| Trace elements solution                                                                                                                                                                                                                                    | 0.5  | ml |
| pH 6.8 ± 0.2 at 25°C                                                                                                                                                                                                                                       |      |    |
| <b>Trace elements solution</b>                                                                                                                                                                                                                             |      |    |
| Disodium EDTA                                                                                                                                                                                                                                              | 0.5  | g  |
| FeSO <sub>4</sub> ·7H <sub>2</sub> O                                                                                                                                                                                                                       | 0.2  | g  |
| H <sub>3</sub> BO <sub>3</sub>                                                                                                                                                                                                                             | 0.03 | g  |
| CoCl <sub>2</sub> ·6H <sub>2</sub> O                                                                                                                                                                                                                       | 0.02 | g  |
| ZnSO <sub>4</sub> ·7H <sub>2</sub> O                                                                                                                                                                                                                       | 0.01 | mg |
| MnCl <sub>2</sub> ·4H <sub>2</sub> O                                                                                                                                                                                                                       | 3.0  | mg |
| Na <sub>2</sub> MoO <sub>4</sub> ·2H <sub>2</sub> O                                                                                                                                                                                                        | 3.0  | mg |
| NiCl <sub>2</sub> ·6H <sub>2</sub> O                                                                                                                                                                                                                       | 2.0  | mg |
| CaCl <sub>2</sub> ·2H <sub>2</sub> O                                                                                                                                                                                                                       | 1.0  | mg |
| <b>Preparation of trace elements solution:</b>                                                                                                                                                                                                             |      |    |
| Add components to distilled/deionized water and bring volume to 1 L. Mix thoroughly.                                                                                                                                                                       |      |    |
| <b>Preparation of medium:</b>                                                                                                                                                                                                                              |      |    |
| Add components to distilled/deionized water and bring volume to 1 L. Mix thoroughly. Gently heat and bring to boiling. Adjust pH to 6.8. Distribute into tubes or flasks. Autoclave for 15 min at 121°C. Pour into sterile Petri dishes or leave in tubes. |      |    |

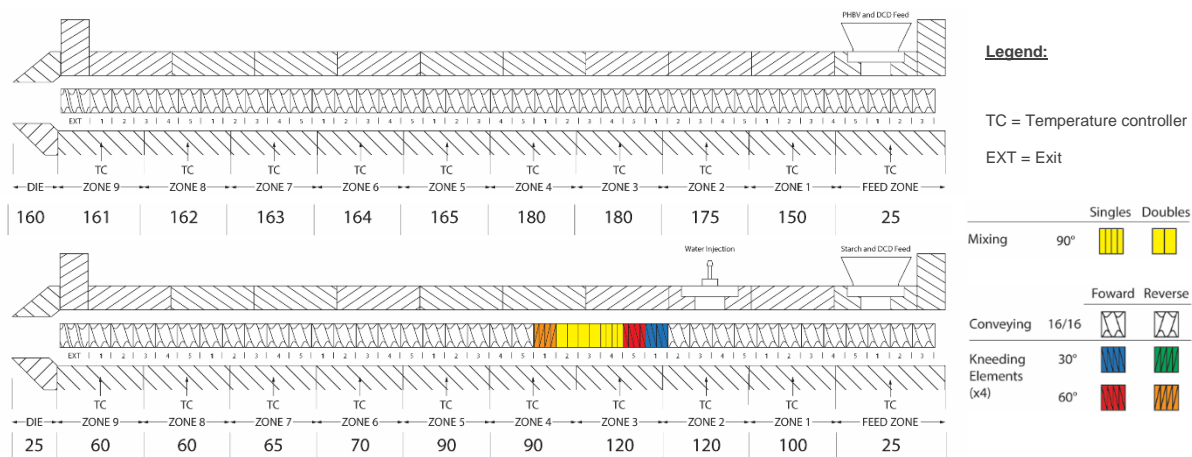

Figure S1: Extruder schematic illustrating the screw profile and temperature for each zone (shown along the bottom) used during the processing of DCD with A) PHBV and B) PS. Material flows from right to left. The starch is plasticized within the extruder with water injected in zone 2 with a peristaltic pump to make a 60: 40 water: starch weight ratio. Kneading and mixing zones in zones 3, 4 and 5 aid the hydration and plasticization of the starch molecules. The mixing section included a 30° and a 60° kneading section, followed by four single and four double mixing screw elements and finally a 60° reverse kneading element.

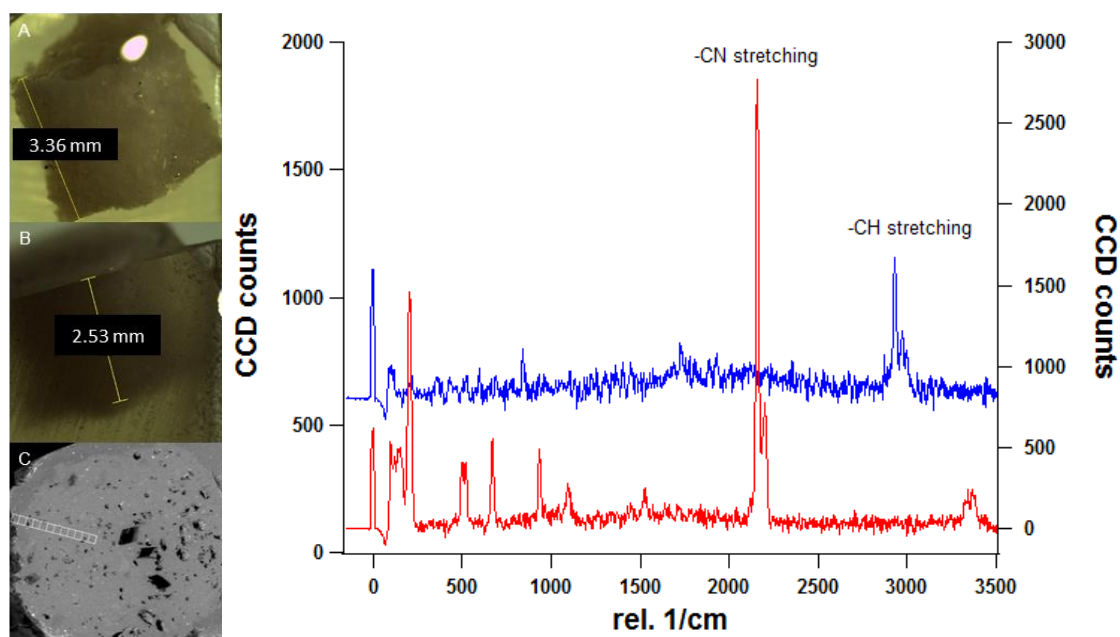

Figure S2: Left - an example of a DCD-PHBV pellet embedded in resin A) before and B) after microtoming. C) is a top view backscattered SEM micrograph of the embedded, microtomed pellet, showing the region of interest (ROI) where the 12 optical images and Raman maps were acquired from. The ROI started at the outer edge and progressively moved toward the centre of the pellet. Right - Raman signature of DCD (red/lower spectrum, right y-axis) and PHBV (blue/upper spectrum, left y-axis) calculated from the microtomed pellet. Raman maps were acquired on an Alpha 300 Raman/AFM (WITec GmbH, Ulm, Germany) equipped with a frequency-doubled continuous-wave Nd:YAG laser to obtain a 532 nm excitation line through a collar corrected objective (Nikon 40X, N.A. 0.6, CFI S Plan Fluor ELWD objective). The back-scattered Raman signal was collected with a 100  $\mu\text{m}$  optical fiber, employing an Andor Raman spectrometer (600 grooves per mm grating) with an electron-multiplier charge-coupled device (EMCCD) spectroscopic detector. Raman maps were generated by binning the CN vibration mode at 2154 rel.  $\text{cm}^{-1}$ .

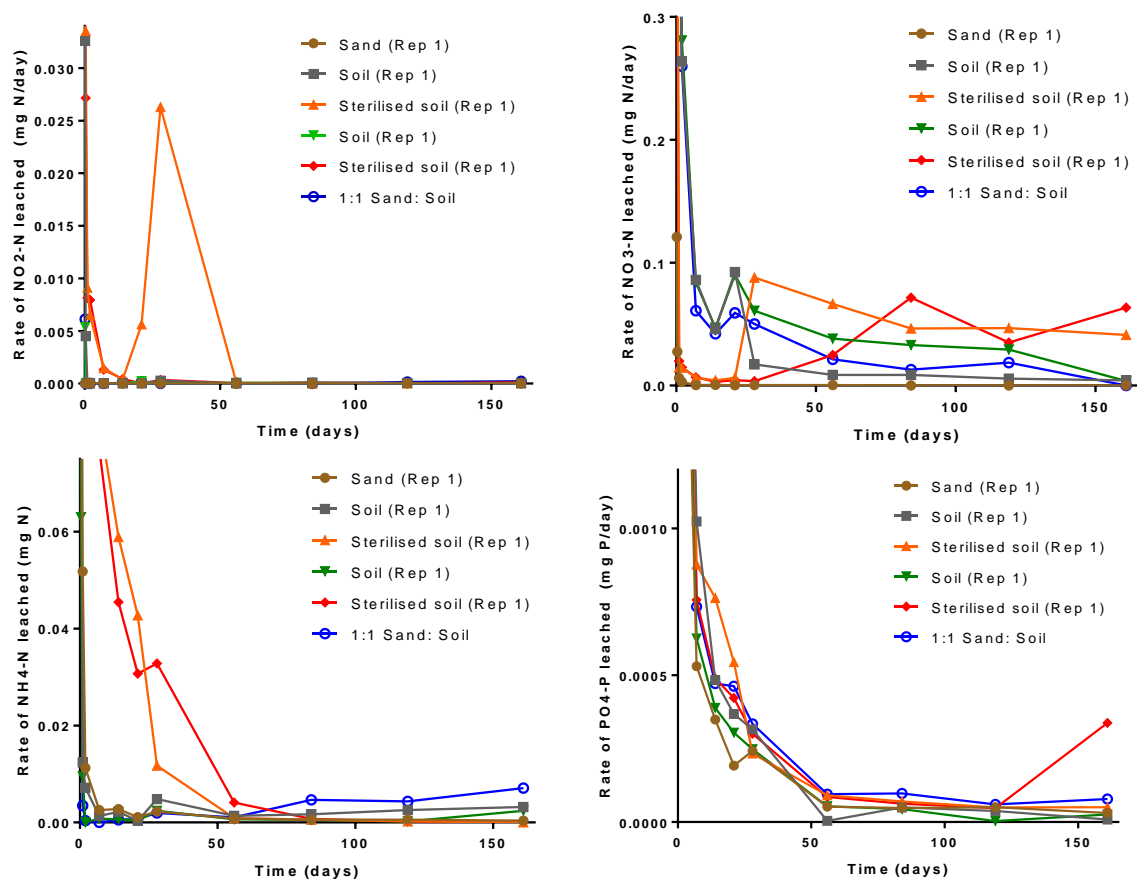

Figure S3: The rate of leaching of nitrite ( $\text{NO}_2^-$ ), top left, nitrate ( $\text{NO}_3^-$ ), top right, ammonia ( $\text{NH}_4^+$ ), bottom left and phosphate ( $\text{PO}_4^-$ ), bottom right, from the incubation columns calculated from FIA results.

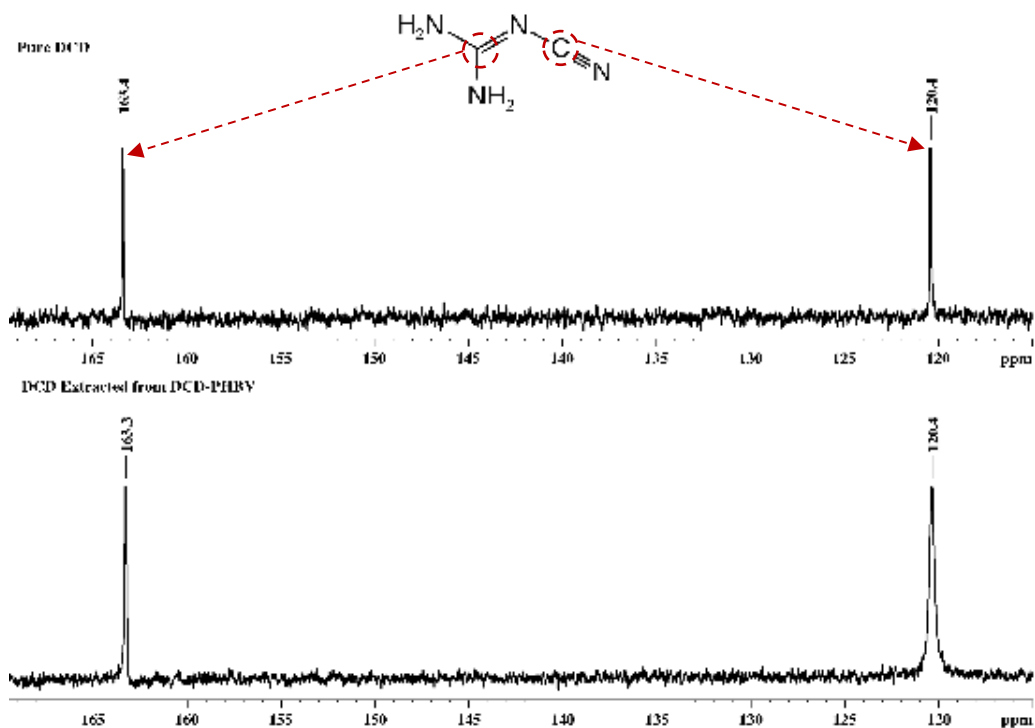

Figure S4: <sup>13</sup>C-NMR of pure DCD (top) and DCD extracted from an extruded DCD-PHBV pellet (bottom).

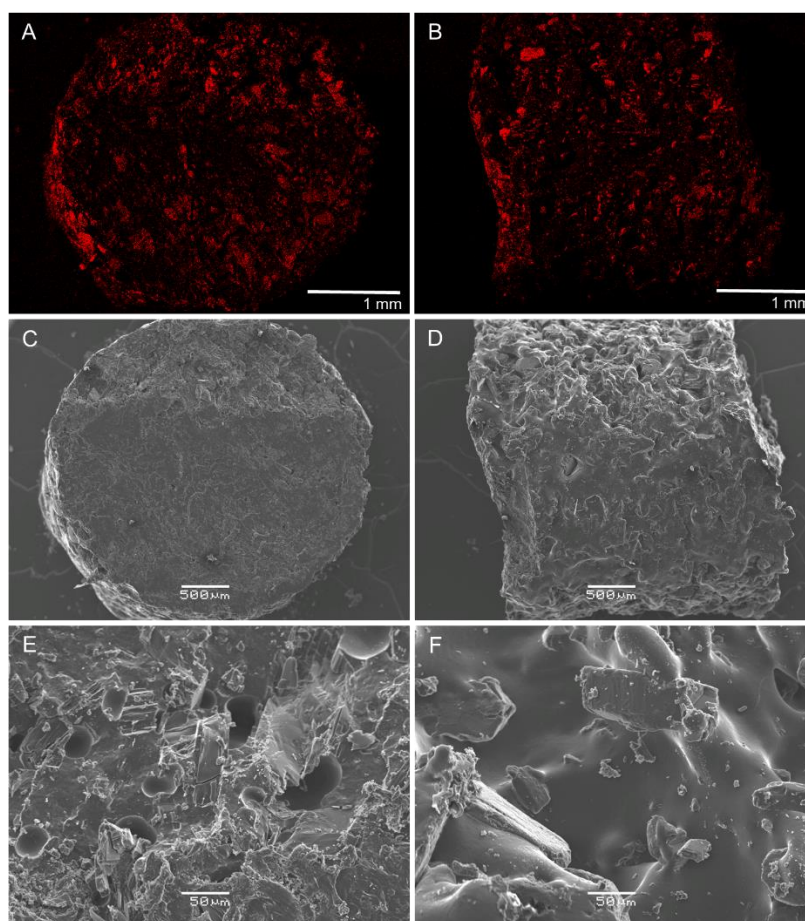

Figure S5: EDX nitrogen map overlays (A and B) and SEM micrographs at 100X (C and D) and 300X (E and F) magnification of the transverse (A, C and E) and lateral (B, D and E) face of a DCD-PHBV pellet. Red regions on the EDX indicates domains rich in nitrogen associated with dicyandiamide crystals.

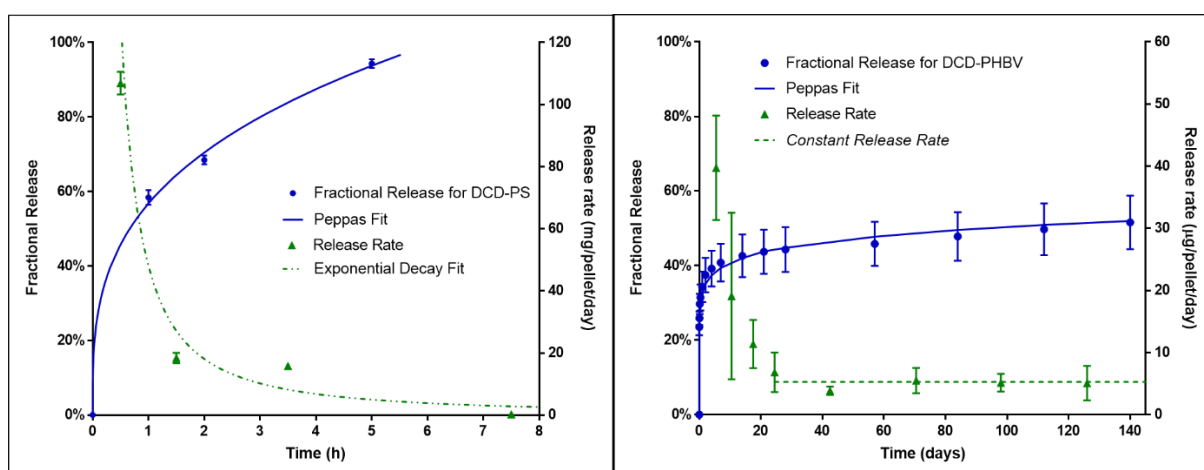

Figure S6: Fractional release and release rate of DCD from DCD-PS pellets (left) and DCD-PHBV (right) into DI water. Data points are the mean of three triplicates with error bars representing one standard deviation from the mean.

Table S3: Results from fitting the Korsmeyer-Peppas equation to the aqueous release data.

|          | $k \text{ (d}^{-n}\text{)}$<br>( $\pm 95\%$ confidence limits) | $n$<br>( $\pm 95\%$ confidence limits) | $R^2$ |
|----------|----------------------------------------------------------------|----------------------------------------|-------|
| DCD-PHBV | 32.9 ( $\pm 1.7$ )                                             | 0.09 ( $\pm 0.02$ )                    | 0.874 |
| DCD-PS   | 153 ( $\pm 10$ )                                               | 0.31 ( $\pm 0.03$ )                    | 0.997 |

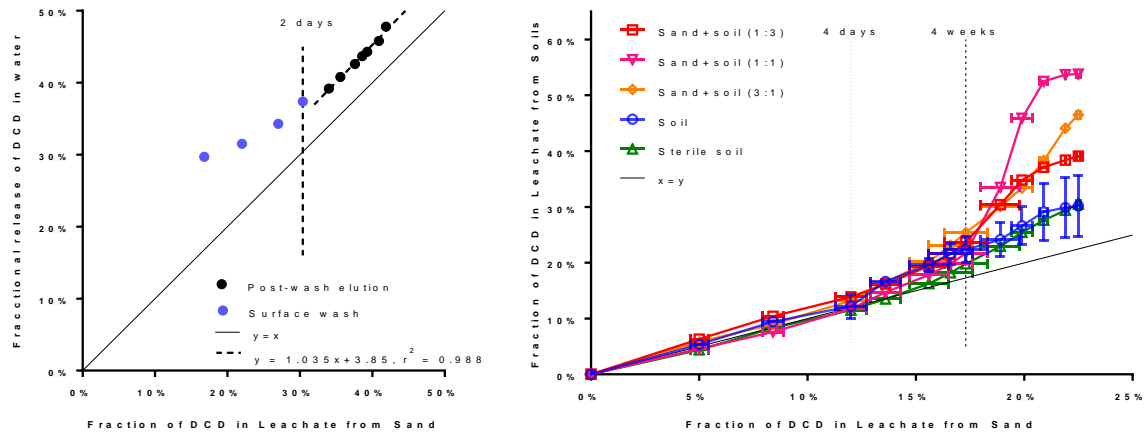

Figure S7: Left - fractional release data for water plotted against sand, with a linear regression fitted to the post-surface wash data. Data points in blue represent time points of 5 h, 10 h, 1 d and 2 d, while data points in black correspond to time points from 4 d out to 12 weeks. Right - the post-surface wash (after 10 h incubation) fraction of DCD accounted for in the leachate for sand plotted against soil and sand: soil mixtures of 1:3, 1:1 and 3:1. Error bars show one standard deviation from the mean.
